# Supplementary material for: miR156-SPL modules regulate induction of somatic embryogenesis in citrus callus
Source: PubMed Central journal article supplement (PMC5972587; doi:10.1093/jxb/ery132), 2018-04-05
Supplement: ery132_suppl_supplementary-tables.pdf [file ery132_suppl_supplementary-tables.pdf]

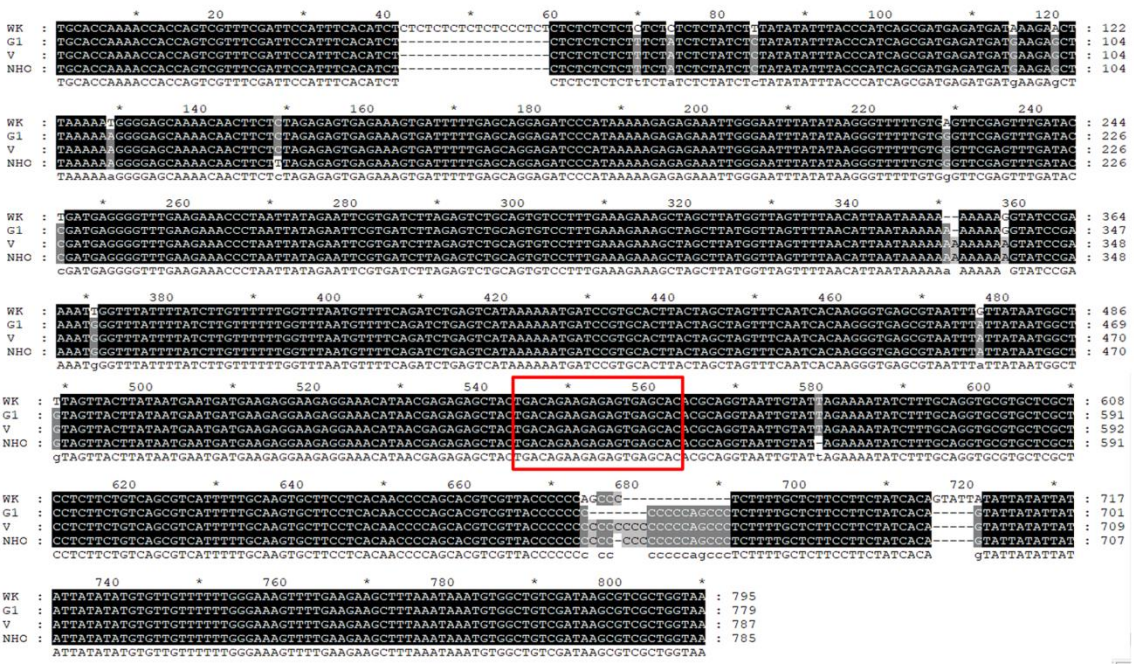

**Figure S1 DNA sequence alignment of *csi-miR156a* gene *CsMIR156A* in different citrus genotypes with various SE capacity.** The red box indicated mature *csi-miR156a* sequence. WK: wild kumquat; G1: 'Guoqing No.1' Satsuma mandarin; V: 'Valencia' sweet orange; NHO: 'Newhall' navel orange. Comparison of somatic embryogenesis (SE) capability was as follows: G1 (recalcitrant to SE) <WK<NH<V (strong SE capability).

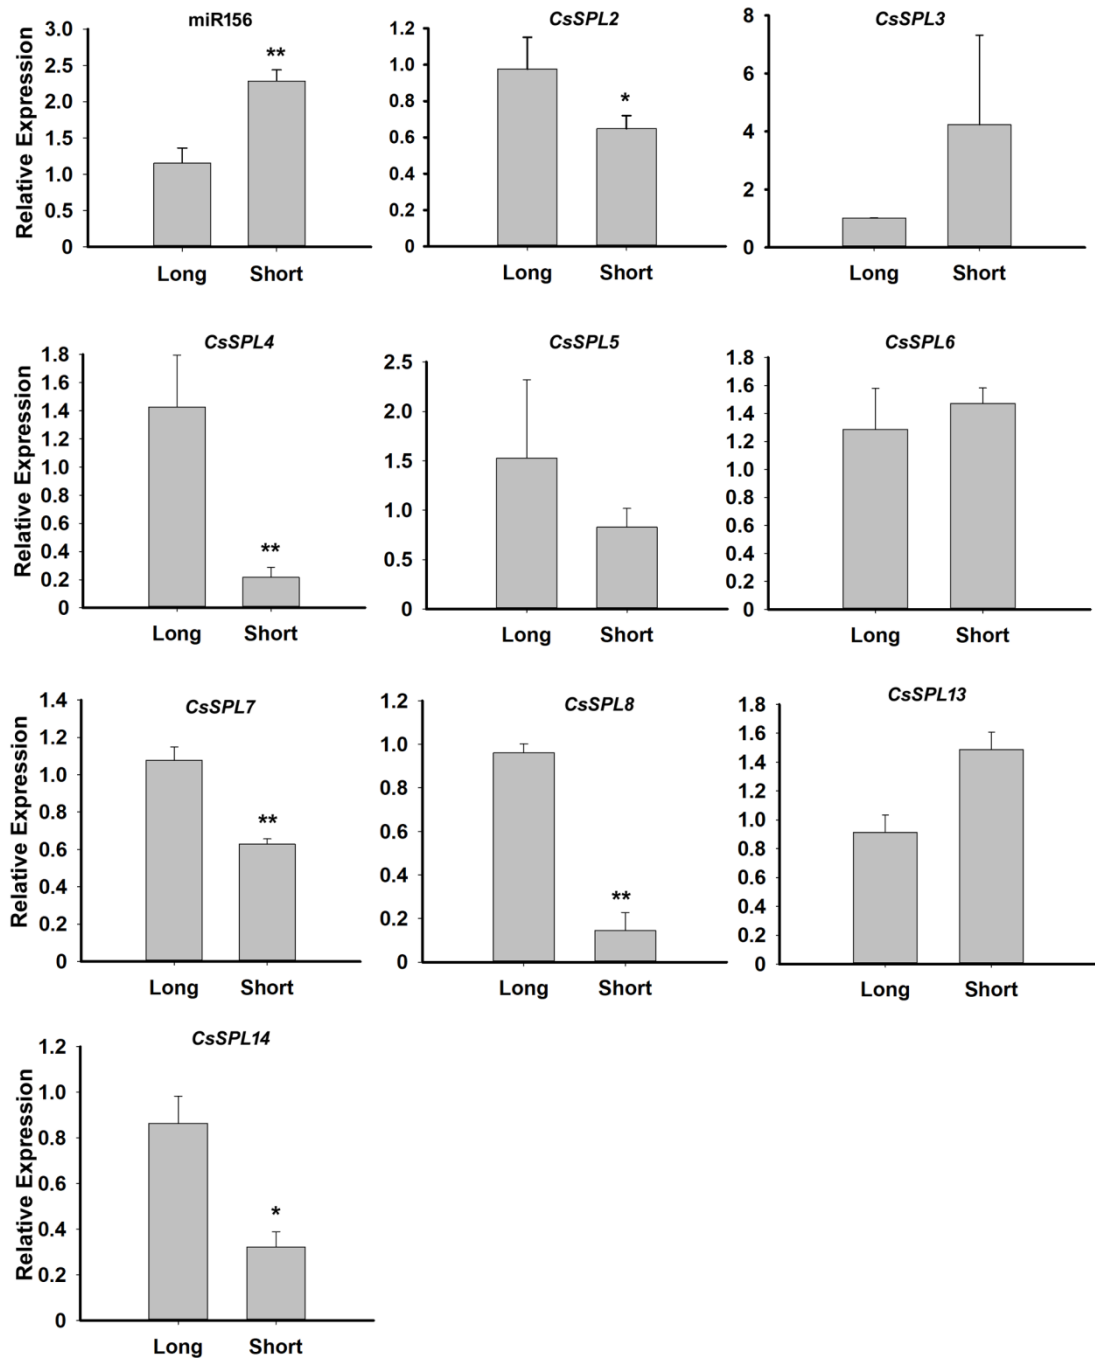

**Figure S2 Expression levels of *csi-miR156* and *CsSPLs* in long- and short-term preserved callus.** The MT subcultured (without SE induction) WK (wild kumquat) callus was used. Error bars indicated standard deviation (SD) of three biological replicates, each containing at least three technical replicates. *CsUBL5* was used as the internal reference. Statistical significance was determined by t-test, \* P<0.05, \*\* P<0.01.

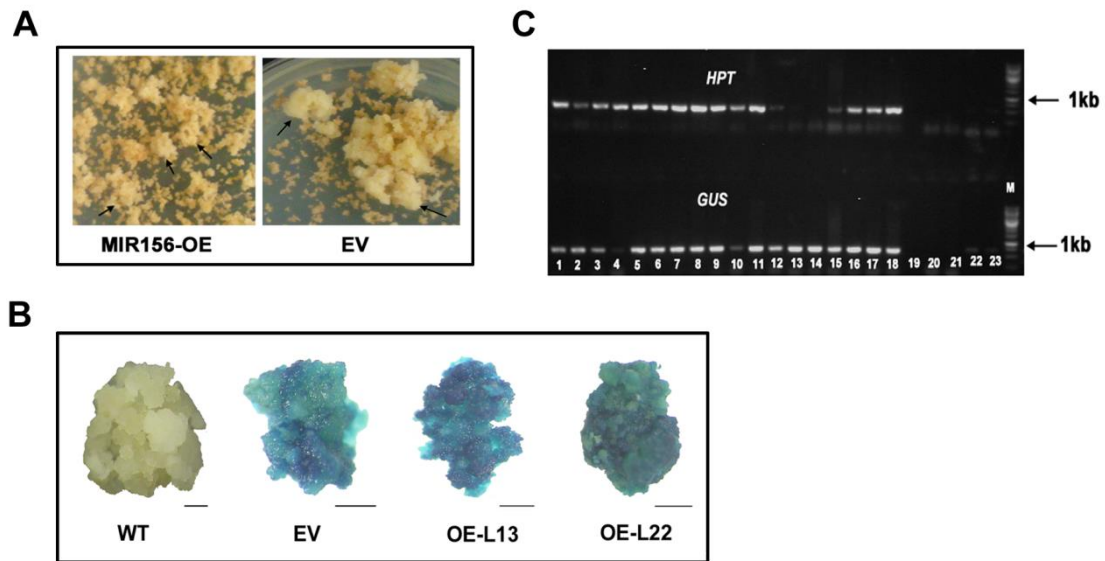

**Figure S3 Generation and characterization of *MIR156a* precursor transgenic callus lines.** (A) Generation of transformed callus. MIR156-OE: *MIR156a* transgenic callus, EV: empty vector transformed callus. The arrows indicated newly generated callus in selected medium. (B) GUS staining of transformed callus; WT: wild type, EV: empty vector, OE-L13&OE-L22: *MIR156a* transformed callus. Bar=1mm. C: Determination of positively transformed callus using PCR. The fragments of hygromycin B phosphotransferase (*HPT*) and  $\beta$ -glucuronidase (*GUS*) gene were amplified, respectively. 1-14: different *MIR156a* transformed lines, 15-18: empty vector control lines; 19-20: wild type; 21-23: H<sub>2</sub>O as template control. *HPT*: hygromycin B phosphotransferase gene; *GUS*:  $\beta$ -Glucuronidase gene.

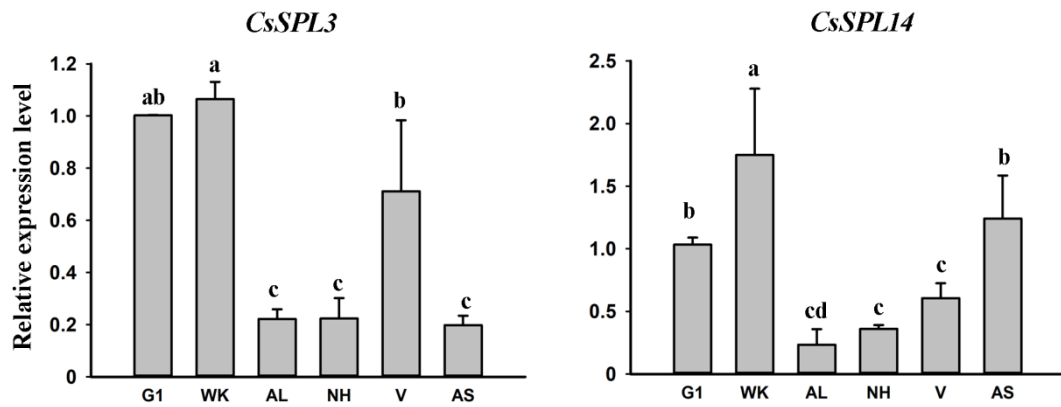

**Figure S4 Expression patterns of *CsSPL3* and *CsSPL14* in callus of different citrus genotypes.** Comparison of somatic embryogenesis (SE) capability was as follows: G1 (recalcitrant to SE) <WK<AL, NH<V, AS (strong SE capability). The callus without SE induction was used. *CsUBL5* was use as endogenous control. Error bars indicate SD of three biological replicates. Statistical significance was determined by multiple comparisons.

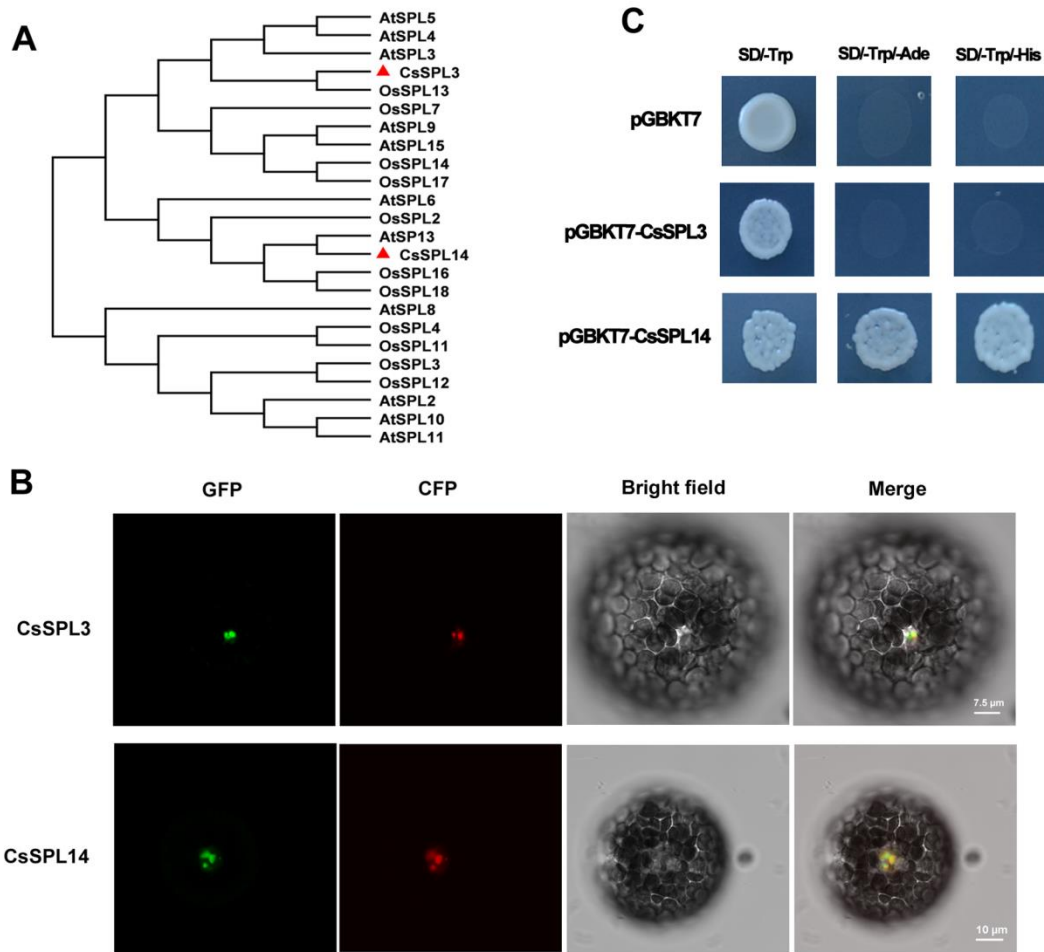

**Figure S5 Phylogenetic tree, subcellular localization and transactivation activity of CsSPL3 and CsSPL14.** (A) Phylogenetic analysis of CsSPL3 and CsSPL14. The protein sequences of miR156-targeted SPLs in Arabidopsis and rice were retrieved, and phylogenetic tree was generated by MEGA6. (B) Subcellular localization of CsSPL3 and CsSPL14 in Arabidopsis protoplast. CsSPL3-GFP and CsSPL14-GFP were co-transformed with OsGhd7-CFP, a nuclear marker, into Arabidopsis mesophyll protoplast, respectively. The photographs were captured under green and cyan fluorescence, bright light and merged. (C) Transactivation activity of CsSPL3 and CsSPL14 in yeast. Full length CsSPL3 and CsSPL14 were fused with the yeast GAL4 DNA-binding domain in pGBKT7 vector. The fused pGBKT7 vectors and empty vector were transformed into the yeast strain Y187, and the transactivation activity was indicated according to the yeast growth on selective medium of SD (synthetic drop-out)/-Trp, SD/-Trp/-His and SD/-Trp/-Ade.

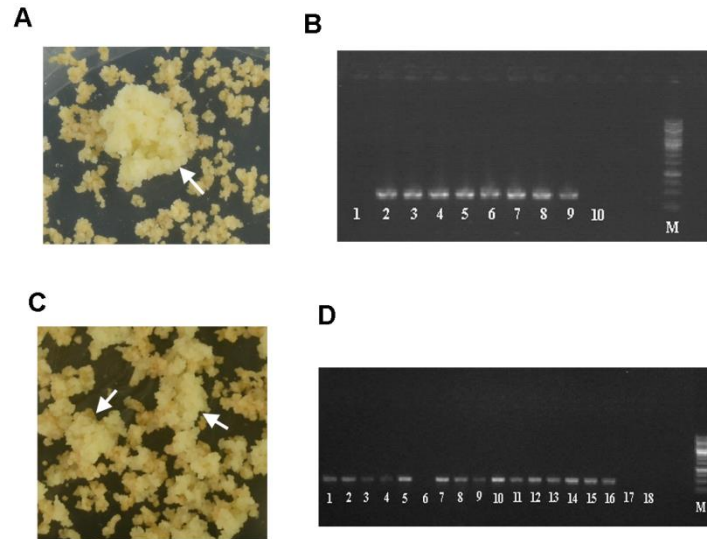

**Figure S6 Generation of *CsSPL3* and *CsSPL14* RNAi calli lines.** (A) Generation of callus transformed with *CsSPL3* RNAi construct. The arrows indicated newly generated callus in selected medium. (B) Determination of *CsSPL3* RNAi positively transformed callus by PCR; The fragment of aminoglycoside phosphotransferase (kanamycin-resistance gene) was amplified. 1: WT; 2-9: transgenic lines; 10: H<sub>2</sub>O as template control. (C) Generation of callus transformed with *CsSPL14* RNAi construct. The arrows indicated newly generated callus in selected medium. (D) Determination of *CsSPL14* RNAi positively transformed callus by PCR. The fragment of aminoglycoside phosphotransferase (kanamycin-resistance gene) was amplified. 1-16: transgenic lines; 17: WT; 18: H<sub>2</sub>O as template control. The arrows in A and C indicated regenerated callus in selected medium.

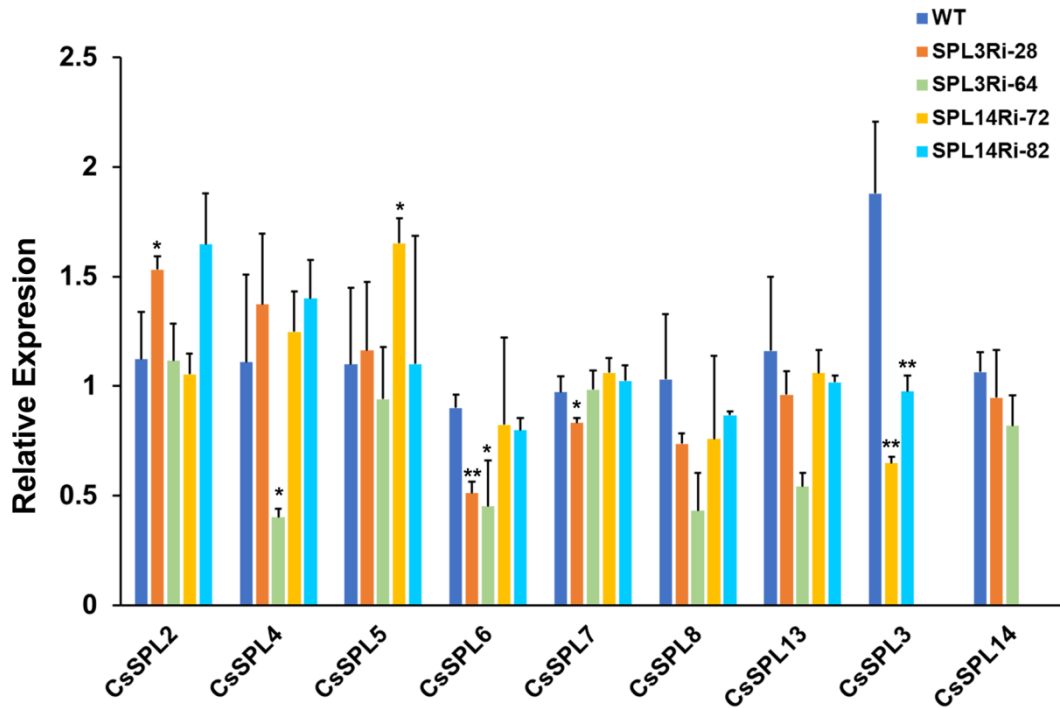

**Figure S7 Transcript abundance detection of predicted miR156-targeted *CsSPLs* in *CsSPL3* and *CsSPL14* RNAi lines.** The callus cultured in MT medium (without SE induction) were used for qRT-PCR. SPL3Ri-L28, SPL3Ri-L64: two *CsSPL3* RNAi lines; SPL14Ri-L72, SPL14Ri-L82: two *CsSPL14* RNAi line. Error bars indicated standard deviation (SD) of two biological replicates, each containing at least three technical replicates. *CsUBL5* was used as the internal reference. Statistical significance was determined by *t*-test, \*  $P < 0.05$ , \*\*  $P < 0.01$ .

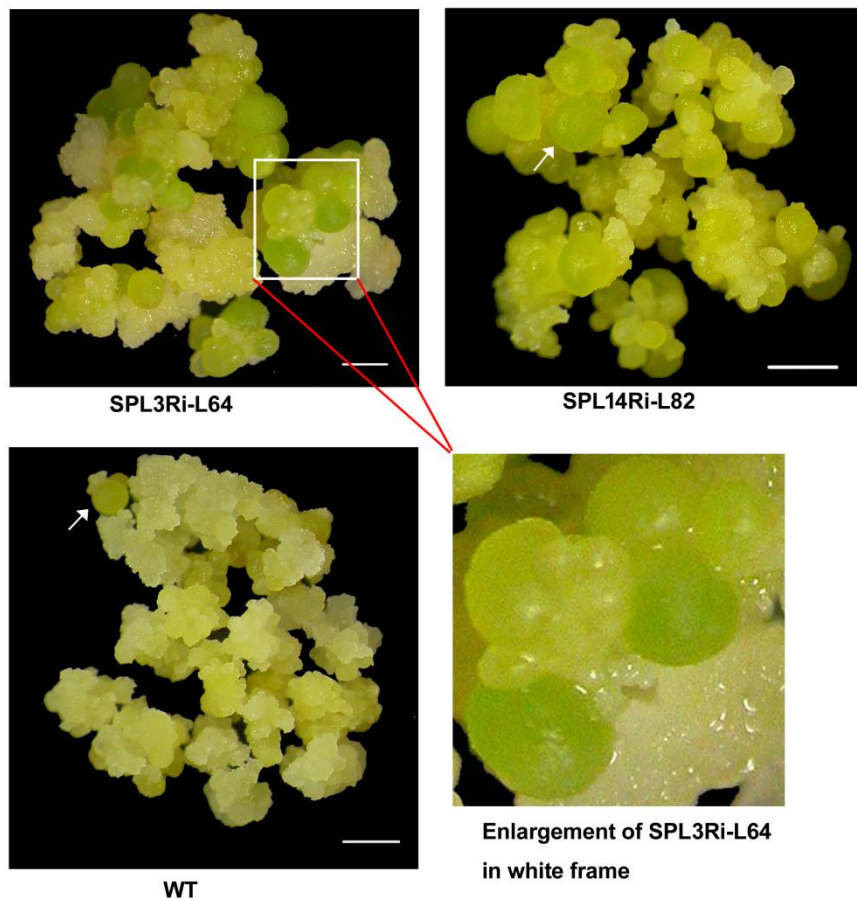

**Figure S8 Somatic embryos formed in RNAi lines at 100 DAI (days after SE induction).** SPL3Ri-L64: *CsSPL3* RNAi line; SPL14Ri-L82: *CsSPL14* RNAi line. Bar=1mm. The arrows indicate somatic embryos.



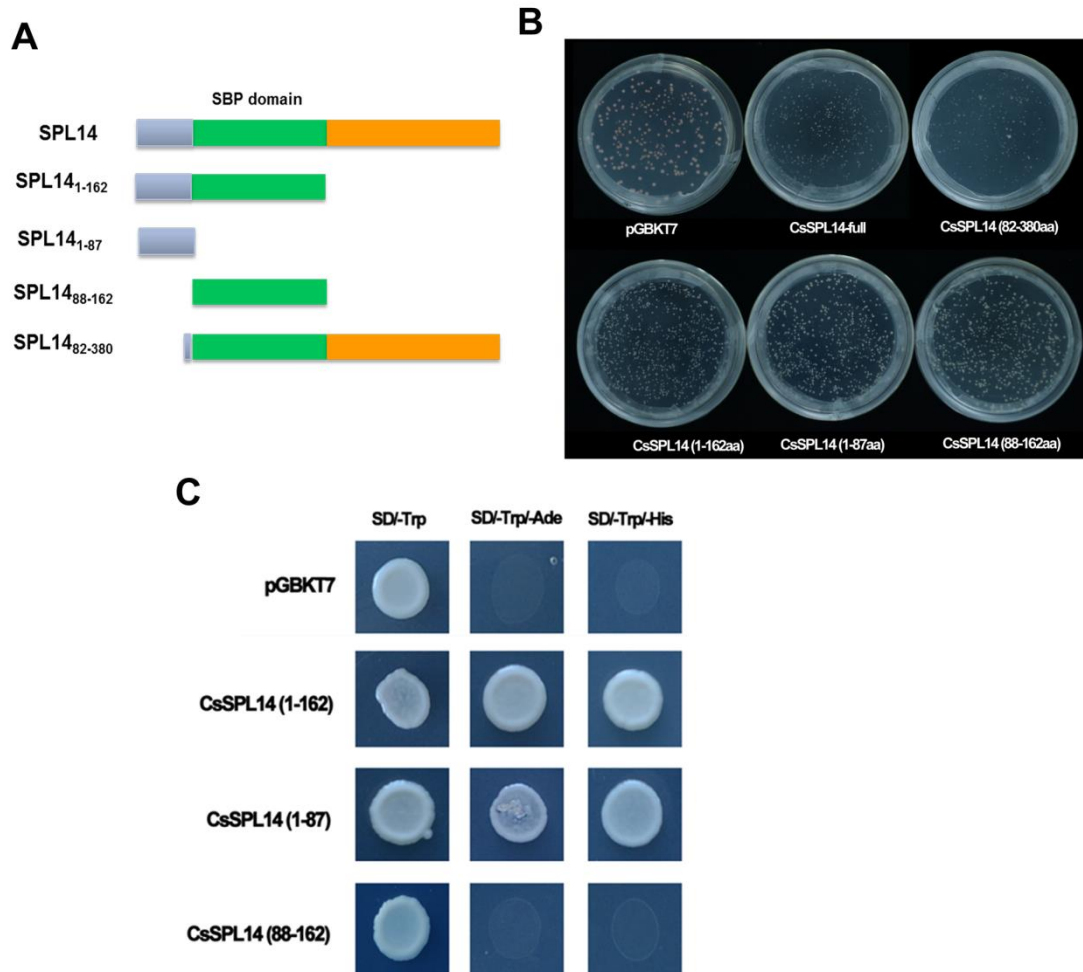

**Figure S9 Yeast growth and self-activation test of truncated CsSPL14.** (A) The sketch map of the truncated fragments of CsSPL14; (B) The growth of transformed yeast with different constructs. (C) Self-activation test of truncated CsSPL14. Because of the toxicity to yeast, bacteria solution of CsSPL14 (82-380aa) transformation was not obtained, thus self-activation detection was cancelled.

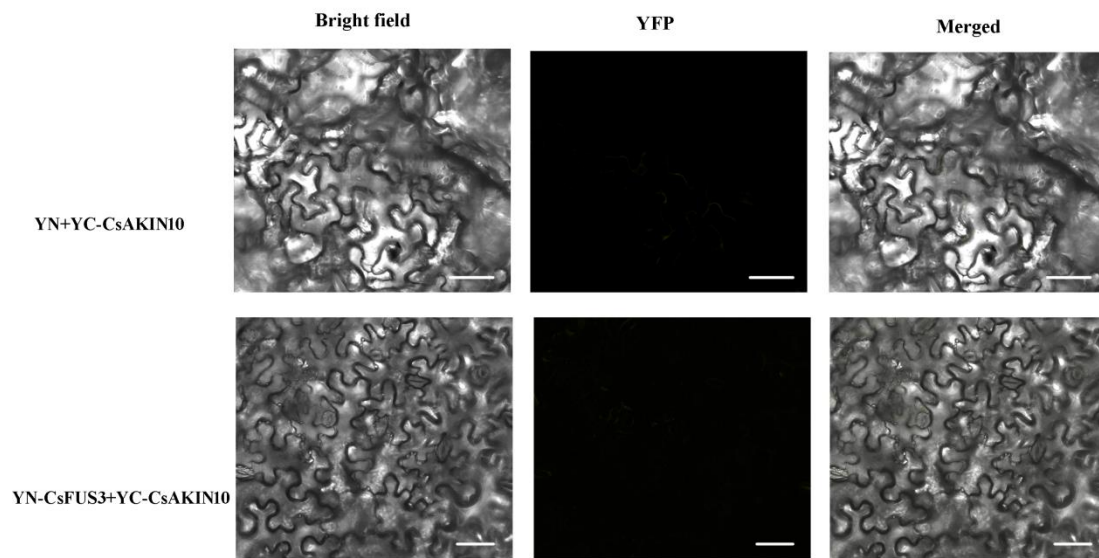

**Figure S10** No interaction was detected between CsAKIN10 and CsFUS3 by BiFC. The construct of CsFUS3 fused with N terminal of YFP construct was co-infiltrated with CsAKIN10 that fused with C terminal of YFP into tobacco leaves. The co-infiltrated leaves were photographed after 3 days. Bar=50  $\mu$ m.

**Table S1 Primers used in this study**

| <b>Primer name</b>                                      | <b>sequence (5'-3')</b>                           |
|---------------------------------------------------------|---------------------------------------------------|
| <b>Primers for RACE</b>                                 |                                                   |
| GeneRacer-5-outer                                       | CGACTGGAGCACGAGGACACTGA                           |
| MIR156a-5-Outer                                         | GGAGCGAGCACGCACCTGCAAAGAT                         |
| GeneRacer-5-Inner                                       | GGACTGACATGGACTGAAGGAGTA                          |
| MIR156a-5-Inner                                         | ACCTGCGTGTGCTCACTCTCTTCTGTCA                      |
| GeneRacer-3-outer                                       | GCTGTCAACGATACGCTACGTAACG                         |
| MIR156a-3-Outer                                         | AGAAGAGAGTGAGCACACGCAGGTA                         |
| GeneRacer-3-Inner                                       | CGCTACGTAACGGCATGACAGTG                           |
| MIR156a-3-Inner                                         | TCTTTGCAGGTGCGTGCTCGCTCCT                         |
| MIR156a-F                                               | TGCACCAAACCACCAGTCGT                              |
| MIR156a-R                                               | TTACCAGCGACGCTTATCGACA                            |
| <b>Primers for miR156a targets SPLs RNAi constructs</b> |                                                   |
| CsSPL3-attb1                                            | AAAAAGCAGGCTAAGTGCTTCTTCAGTAAGGTGCC               |
| CsSPL3-attb2                                            | AGAAAGCTGGGTGGTAATAACGAGTGTTCCCTCAA               |
| CsSPL14-attb1                                           | AAAAAGCAGGCTGCCAGTGATACCCCTCAAACA                 |
| CsSPL14-attb2                                           | AGAAAGCTGGGTGGTGTGCTTGCCATAAGCATTTA               |
| attB1-adapter                                           | GGGACAAGTTTGTACAAAAAAGCAGGCT                      |
| attB2-adapter                                           | GGGACCACTTTGTACAAGAAAGCTGGGT                      |
| <b>Primers for transactivation assay of two SPLs</b>    |                                                   |
| PBD-SPL3-F                                              | ATATGGCCATGGAGGCCGAATTCATGGACAACGATATGGAAGA       |
| PBD-SPL3-R                                              | GGGGTTATGCTAGTTATGCGGCCGCTACTGAGGACCTACCCCTC      |
| PBD-SPL14-F                                             | ATATGGCCATGGAGGCCGAATTCATGGACTGGAAGTTGAAACC       |
| PBD-SPL14-R                                             | GGGGTTATGCTAGTTATGCGGCCGCTACTCCAATGAAAGGGA        |
| <b>primers for truncated CsSPL14 bait vectors</b>       |                                                   |
| PBD-SPL14-H1-R                                          | GGGGTTATGCTAGTTATGCGGCCGCTAAGGTTTCCTTCGTCTTCTGTTG |
| PBD-SPL14-H2-R                                          | GGGGTTATGCTAGTTATGCGGCCGCTATGACGCAGTCTGGCTTCC     |
| PBD-SPL14-Q1-F                                          | ATATGGCCATGGAGGCCGAATTCAGCCAGACTGCGTCATGTC        |

---

PBD-SBP-domain-F ATATGGCCATGGAGGCCGAATTCTGTCTTGTGTTGATGGGTGTGA

PBD-SBP-domain-R GGGGTTATGCTAGTTATGCGGCCGCTAAGGTTTCCTTCGTCTTC

**primers for AD vectors construction of potential proteins interacted with CsSPL14**

PAD-CsAKIN10-F GCCATGGAGGCCAGTGAATTCATGGATGGAGCCTCTAACCG

PAD-CsAKIN10-R TACGATTCATCTGCAGCTCGAGTTAAAGAACCCGAAGCTGTGC

**primers for BiFC assay**

PCL112-SPL14-F AAAAAAGCAGGCTTCATGGACTGGAACCTGAAACC

PCL112-SPL14-R AGAAAGCTGGGTGCTACTCCCAATGAAAGGGAATTG

PCL113-AKIN10-F AAAAAAGCAGGCTTCATGGATGGAGCCTCTAACCGAAG

PCL113-AKIN10-R AGAAAGCTGGGTGTTAAAGAACCCGAAGCTGTGC

**primers for verification of RNA-seq by qRT-PCR**

CsFUS3-qF TTGCCGAGCGTCCTTCAC

CsFUS3-qR AAGGGAAGAGACCAGCAGGCAG

CsPOD-qF GGGCTTGATGATGGTTGA

CsPOD-qR GAGGGTTGTTCTCAGAAAGG

CsZFP-qF TGTGCAATAATTCAAGACTACTCCG

CsZFP-qR TCTCAGAAAGACGCCTTCTCTC

CsLEA6-qF GCTCTGTTTCGGTTTCAGCAGTTCT

CsLEA6-qR TTCAGCTCTTTCTTGTCCTGACGA

CsLEA4-qF GGAAGAAACACAGTAGAATCCGCCA

CsLEA4-qR TCTCCATCGGGTCCCTCGTC

CsAKIN10-qF GTTCCAAGCCCATCTTCC

CsAKIN10-qR AATCCCATCTTAACCACTTCC

---

**Table S2 Summary of RNA-seq data**

| <b>Sample</b> | <b>raw reads</b> | <b>clean reads</b> | <b>aligned reads</b> | <b>mapped rate</b> |
|---------------|------------------|--------------------|----------------------|--------------------|
| WT-G40-BR1    | 14,204,258       | 13601584           | 12148935             | 89.32%             |
| WT-G40-BR2    | 13,556,650       | 12974625           | 11561688             | 89.11%             |
| WT-G60-BR1    | 15,856,574       | 15203851           | 13543590             | 89.08%             |
| WT-G60-BR2    | 16,642,318       | 15910971           | 14195768             | 89.22%             |
| OE-G40-BR1    | 14,769,896       | 14112290           | 12495022             | 88.54%             |
| OE-G40-BR2    | 15,952,460       | 15257508           | 13478483             | 88.34%             |
| OE-G60-BR1    | 15,506,111       | 14992660           | 13362958             | 89.13%             |
| OE-G60-BR2    | 16,552,734       | 15971150           | 14219115             | 89.03%             |

WT, wild type; OE, miR156 overexpression lines; G40, 40 DAI; G60, 60 DAI;  
BR1/BR2 indicated two biological replicates respectively.

**Table S3 Correlation of coefficients between biological replicates of RNA-seq data**

| Samples    | WT-G40-BR1 | WT-G40-BR2  | OE-G40-BR1 | OE-G40-BR2  | WT-G60-BR1 | WT-G60-BR2  | OE-G60-BR1 | OE-G60-BR2  |
|------------|------------|-------------|------------|-------------|------------|-------------|------------|-------------|
| WT-G40-BR1 | 1.00       | <b>0.98</b> | 0.54       | 0.52        | 0.96       | 0.96        | 0.81       | 0.78        |
| WT-G40-BR2 |            | 1.00        | 0.56       | 0.53        | 0.96       | 0.96        | 0.81       | 0.75        |
| OE-G40-BR1 |            |             | 1.00       | <b>0.94</b> | 0.44       | 0.44        | 0.82       | 0.86        |
| OE-G40-BR2 |            |             |            | 1.00        | 0.41       | 0.42        | 0.82       | 0.91        |
| WT-G60-BR1 |            |             |            |             | 1.00       | <b>0.98</b> | 0.75       | 0.67        |
| WT-G60-BR2 |            |             |            |             |            | 1.00        | 0.76       | 0.68        |
| OE-G60-BR1 |            |             |            |             |            |             | 1.00       | <b>0.95</b> |
| OE-G60-BR2 |            |             |            |             |            |             |            | 1.00        |

WT, wild type; OE, csi-miR156a overexpression lines; G40, 40 DAI; G60, 60 DAI; BR1/BR2 indicated two biological replicates respectively.
